# Supplementary material for: Mutagenesis of OsNRAMP5 affects blast resistance through Mn absorption in rice
Source: Research Square preprint supplement (doi:10.21203/rs.3.rs-7417783/v1), 2025-08-22
Supplement: Supplementary file 1 [file 2b5211f0ab858ebfc67a86ec.docx]

**Table S1**. The Cd content in grains of *osnramp5* mutants grown in soil with 1.5 mg/kg Cd, and pH values were about 5.5.

| Materials | Cd content in grain (mg/kg) |
| --- | --- |
| H268 | 1.213±0.182 |
| *H268-N5-4* | 0.021±0.001** |
| *H268-N5-10* | 0.018±0.002** |
| J4128S | 1.322±0.226 |
| *J4128S-N5-3* | 0.025±0.003** |
| *J4128S-N5-4* | 0.034±0.002** |
| LZ36S | 1.191±0.185 |
| *LZ36S-N5-1* | 0.065±0.005** |
| *LZ36S-N5-2* | 0.053±0.004** |
| J4155S | 1.253±0.152 |
| *J4155S-N5-1* | 0.024±0.003** |
| *J4155S-N5-2* | 0.035±0.005** |

Asterisks indicate significant differences (***P* ≤ 0.01, Student’s *t*-test) when compared with

the control, respectively (n = 3).

**Table S2.** Primers used in this study.

| Primer name | Forward sequence (5’-3’) | Reverse sequence (5’-3’) | Purpose |
| --- | --- | --- | --- |
| N5-target1 | GGCACCGTCGTCTACCTCACCATC | AAACGATGGTGAGGTAGACGACGG | sgRNA |
| N5-target2 | GGCACAGTCGCTAGCAGCTAATCT | AAACAGATTAGCTGCTAGCGACTG | sgRNA |
| 26N5-CX-1 | GTCACTACCACCATTCTCTTCTTCG | TTAGCTCAAAGTCAAAGATGGTGAC | Sequencing |
| 26N5-CX-4 | AGTTACCACCCGTCAAAGATGAC | CGATCTGGACCGCACAAATA | Sequencing |
| OsUbi-qPCR | TTCTGGTCCTTCCACTTTCAG | ACGATTGATTTAACCAGTCCATGA | RT-qPCR |
| MoPot-qPCR | ACGACCCGTCTTTACTTATTTGG | AAGTAGCGTTGGTTTTGTTGGAT | RT-qPCR  RT-qPCR |
| OsPR1a-qPCR | GGAAGTACGGCGAGAACATC | GTGGTCGTACCACTGCTTCTC |
| OsPR1b-qPCR | GGTGACCTGGGACACGAGC | GCCGAACCCCAGAAGAGG | RT-qPCR |
| OsPR4-qPCR | AGTATGGATGGACCGCCTTC | GCAATTATTGTCGCACCTGTTC | RT-qPCR |
| OsPR10-qPCR  OsKS4-qPCR | TGCGGGAGTCGGGAATACA  GAGAAGACGGTGTCATTCCTAAA | CTCCAGCACCTCTGACTTTAGCA  TTACTCCATTCATAGCACCCATC | RT-qPCR  RT-qPCR |
| OsKS4-qPCR | GAGAAGACGGTGTCATTCCTAAA | TTACTCCATTCATAGCACCCATC | RT-qPCR |
| OsRir1b-qPCR | GTGCTCCTGTTGGTCCTGGC | AACTAATGCTGCTGCTGCCACT | RT-qPCR |
| OsNRAMP5-qPCR | CTGCTCTGGGTGATTCTGATTG | CAGCCATAGGAAAATCTTGACG | RT-qPCR |
| OsACTIN-qPCR | ACCCAAGAATGCTAAGCCAAGAG | ACTTTGTCCACGCTAATGAAGAAAC | RT-qPCR |
